# Supplementary material
Source: Springer Nature journal article supplement (https://www.springermedizin.de/resource/supplementary/12916_2013_888_MOESM21_ESM.pdf/9598866)
Supplement: MOESM21 [file 9598866]

| Child Causes                                                                         | Tariff |        | SSP    |        | RF     |        | PCVA   |        | InterVA |        |
|--------------------------------------------------------------------------------------|--------|--------|--------|--------|--------|--------|--------|--------|---------|--------|
|                                                                                      | No HCE | HCE    | No HCE  | HCE    |
|                                                                                      | Median  | Median |
| <b>GBD Cause Group A: Communicable, maternal, neonatal and nutritional disorders</b> |        |        |        |        |        |        |        |        |         |        |
| AIDS                                                                                 | 40     | 60     | 43.1   | 57.2   | 60     | 60     | 39.3   | 50     | 28.2    | 28.2   |
| Diarrhea/Dysentery                                                                   | 28.2   | 40     | 53.2   | 62.1   | 53.8   | 58.3   | 43.8   | 58.6   | 29.5    | 28.4   |
| Encephalitis                                                                         | 40     | 44.4   | 19.2   | 33.3   | 20     | 30     | 20     | 37.9   |         |        |
| Hemorrhagic fever                                                                    | 53.8   | 61.5   | 39     | 66.7   | 46.2   | 63.6   | 23.5   | 63.4   | 0       | 0      |
| Malaria                                                                              | 44.8   | 59.3   | 34.5   | 52.5   | 45.5   | 53.6   | 43.6   | 41.9   | 34.6    | 44.7   |
| Measles                                                                              | 83.3   | 83.3   | 84.6   | 86.7   | 83.3   | 83.3   | 0      | 38.9   | 0       | 0      |
| Meningitis                                                                           | 30.8   | 33.3   | 23.8   | 23.9   | 28.6   | 28.6   | 10.1   | 23.5   | 6.9     | 7      |
| Other Infectious Diseases                                                            | 11.8   | 30     | 12.2   | 23.3   | 28.6   | 41.2   | 12.5   | 40     | 6.5     | 6.5    |
| Pneumonia                                                                            | 12     | 14.2   | 41.4   | 39.6   | 46.6   | 50     | 37.4   | 38.1   | 76.2    | 75     |
| Sepsis                                                                               | 17.2   | 18.8   | 10.6   | 10.3   | 15.6   | 18.5   | 0.7    | 0      | 0       | 0      |
| <b>GBD Cause Group B: Non-communicable diseases</b>                                  |        |        |        |        |        |        |        |        |         |        |
| Other Cancers                                                                        | 28.6   | 42.9   | 28.6   | 24.4   | 14.3   | 28.6   | 0      | 58.7   |         |        |
| Other Cardiovascular Diseases                                                        | 16.7   | 36.8   | 4.9    | 24     | 11.8   | 26.3   | 0      | 0      | 0       | 0      |
| Other Defined Causes of Child Deaths                                                 | 10.4   | 20.9   | 24.5   | 24.5   | 29.5   | 32.5   | 40.4   | 47.4   | 13.8    | 10.1   |
| Other Digestive Diseases                                                             | 8.3    | 25     | 29.3   | 33.3   | 25     | 33.3   | 0      | 41.2   |         |        |
| <b>GBD Cause Group C: Injuries</b>                                                   |        |        |        |        |        |        |        |        |         |        |
| Bite of Venomous Animal                                                              | 92.9   | 92.9   | 92.5   | 95.7   | 88.9   | 90.9   | 65.3   | 100    | 88.2    | 86.5   |
| Drowning                                                                             | 90.5   | 94.1   | 88.5   | 90.6   | 85.7   | 88.9   | 84.8   | 100    | 81.6    | 83.3   |
| Falls                                                                                | 75     | 75     | 63.1   | 73.2   | 54.5   | 50     | 71.6   | 45.3   | 41.2    | 44.8   |
| Fires                                                                                | 70.6   | 76.5   | 74.5   | 79.4   | 62.5   | 65.7   | 71.2   | 60.4   | 37.5    | 44.3   |
| Poisonings                                                                           | 50     | 75     | 55.3   | 75.8   | 50     | 50     | 40.6   | 54.6   | 23      | 23     |
| Road Traffic                                                                         | 90.9   | 91.3   | 88.9   | 92.6   | 83.3   | 85.7   | 90.8   | 86.8   | 64.9    | 64.9   |
| Violent Death                                                                        | 84.6   | 84.6   | 82.4   | 80     | 76.9   | 76.9   | 87.8   | 88.8   | 73.7    | 70.1   |
